# Supplementary material for: Comprehensive analysis of scRNA-seq and bulk RNA-seq reveal the characteristics of disulfidptosis and a prognostic signature in BLCA
Source: publisher site journal article supplement (doi:10.18632/aging.205686), 2024-03-20
Supplement: Supplementary file [file aging-v16i6-205686-supplementary-material-SD1.pdf]

## SUPPLEMENTARY FIGURE

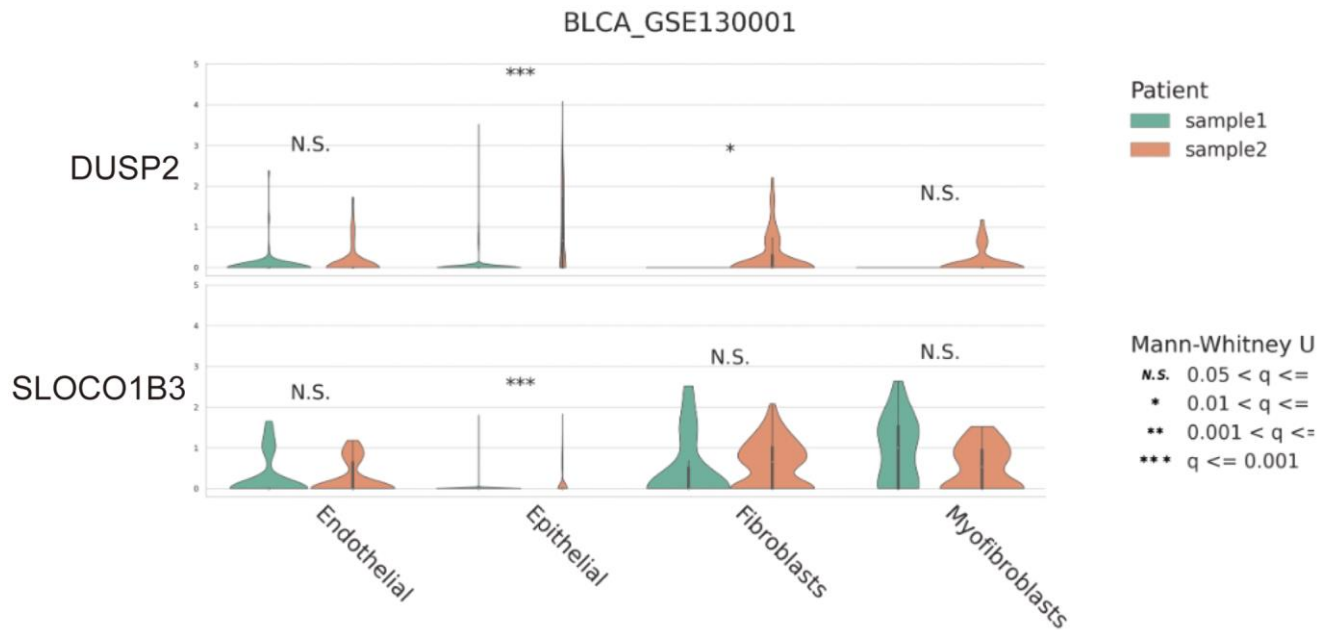

**Supplementary Figure 1. Single-cell RNA sequencing analysis of DUSP2 and SCL1B03.** The analysis was performed on TISCH database. \* $P < 0.05$ , \*\* $P < 0.01$ .
